# Supplementary material for: Distinct roles for H4 and H2A.Z acetylation in RNA transcription in African trypanosomes
Source: PubMed Central journal article supplement (PMC7083915; doi:10.1038/s41467-020-15274-0), 2020-03-20
Supplement: 41467_2020_15274_MOESM4_ESM.pdf [file 41467_2020_15274_MOESM4_ESM.pdf]

## **Description of Additional Supplementary Files**

File Name: Supplementary Data 1

Description: Overview of *T. brucei* histone modifications

File Name: Supplementary Data 2

Description: Expression data after HAT1 or HAT2 depletion based on RNAseq

File Name: Supplementary Data 3

Description: Quantification of H2A.Z levels after HAT2 depletion based on western blots

File Name: Supplementary Data 4

Description: Quantification of RNA Pol levels after HAT1 depletion based on western blots

File Name: Supplementary Data 5

Description: ERCC spike in values based on RNA-seq

File Name: Supplementary Data 6

Description: Information on sequencing data used for the individual Figures

File Name: Supplementary Data 7

Description: Statistical analyses of changes in histone acetylation levels
